# Supplementary material for: Ammonia impacts methane oxidation and methanotrophic community in freshwater sediment
Source: Copernicus journal article supplement (doi:10.5194/bg-2018-193), 2018-05-07

## Supplementary Material

**Table S1** Multiple comparison of treatments by means of Student-Newman-Keuls post-hoc testing. In each column, different characters indicate significant difference at 0.05 level.

| treatment | MOP   |        | <i>pmoA</i> abundance |        | transcript abundance |       |
|-----------|-------|--------|-----------------------|--------|----------------------|-------|
|           | Day 1 | Day 14 | Day 7                 | Day 14 | Day 1                | Day 7 |
| A         | a     | b      | b                     | ab     | d                    | b     |
| B         | a     | ab     | b                     | b      | c                    | b     |
| C         | a     | b      | b                     | b      | a                    | b     |
| D         | a     | b      | b                     | b      | b                    | b     |
| E         | a     | ab     | b                     | b      | b                    | b     |
| F         | b     | a      | a                     | a      | b                    | a     |

**Fig. S1.** Change of ammonium concentration of pore water in the microcosms with different treatments

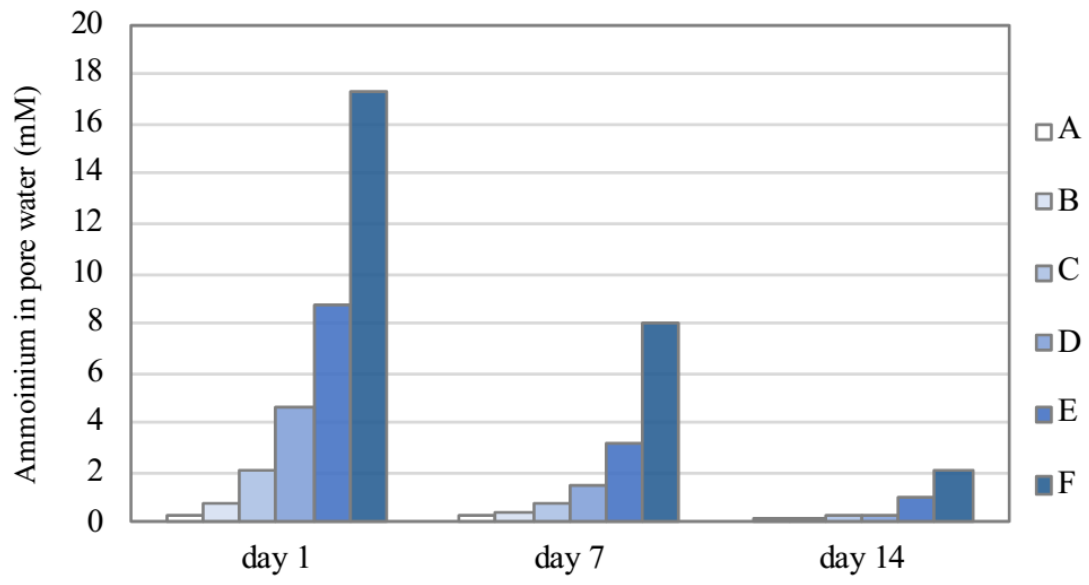

**Fig. S2.** The ratio of transcripts to *pmoA* gene in the microcosms with different treatments

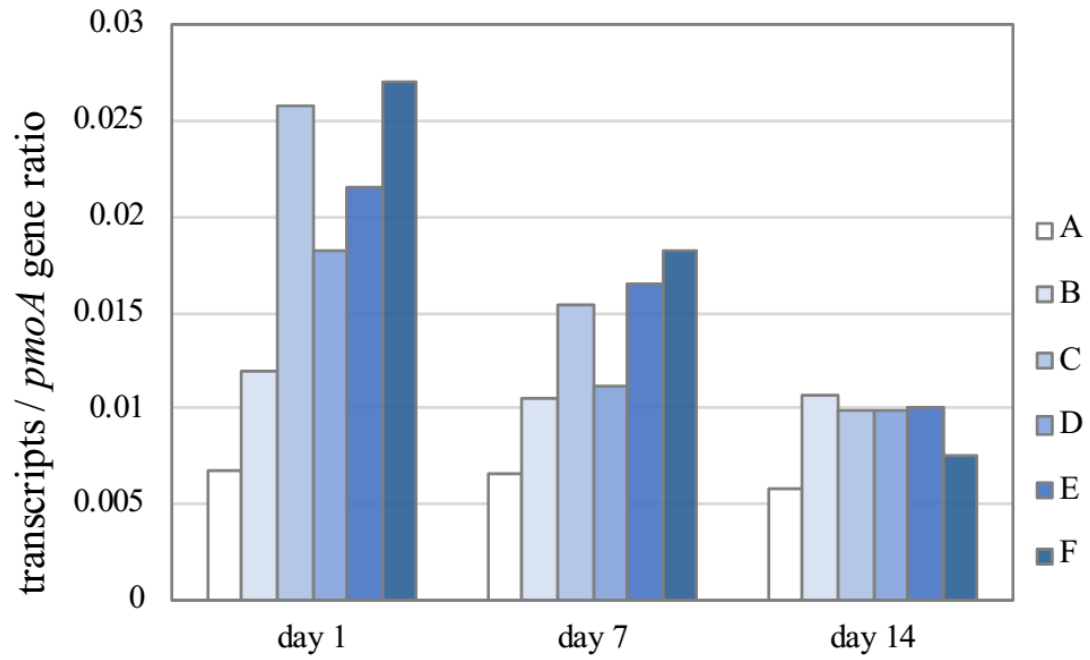

Supplement: Supplementary file 1 [file bg-2018-193-supplement.pdf]
